# Supplementary material for: Rapid harvesting of stem cell sheets by thermoresponsive bulk poly(N-isopropylacrylamide) (PNIPAAm) nanotopography
Source: Royal Society of Chemistry journal article supplement (doi:10.1039/d0bm01338b), 2020-01-01
Supplement: d0bm01338b1.pdf [file d0bm01338b1.pdf]

## Supplementary Information for

Rapid harvest of stem cell sheet by thermoresponsive bulk poly(*N*-isopropylacrylamide) (PNIPAAm) nanotopography

*Andrew Choi,<sup>a</sup> Hyungjun Yoon,<sup>a</sup> Seon Jin Han,<sup>a</sup> Ji-Ho Lee,<sup>b</sup> In Hyeok Rhyou,<sup>b</sup> and Dong Sung Kim<sup>b\*</sup>*

<sup>a</sup> Department of Mechanical Engineering, Pohang University of Science and Technology (POSTECH), 77 Cheongam-ro, Pohang, 37673, Korea

<sup>b</sup> Department of Orthopedic Surgery, Pohang Semyeong Christianity Hospital, 351 Posco-daero, Pohang, 37816, Korea

\* Corresponding author: [smkds@postech.ac.kr](mailto:smkds@postech.ac.kr)

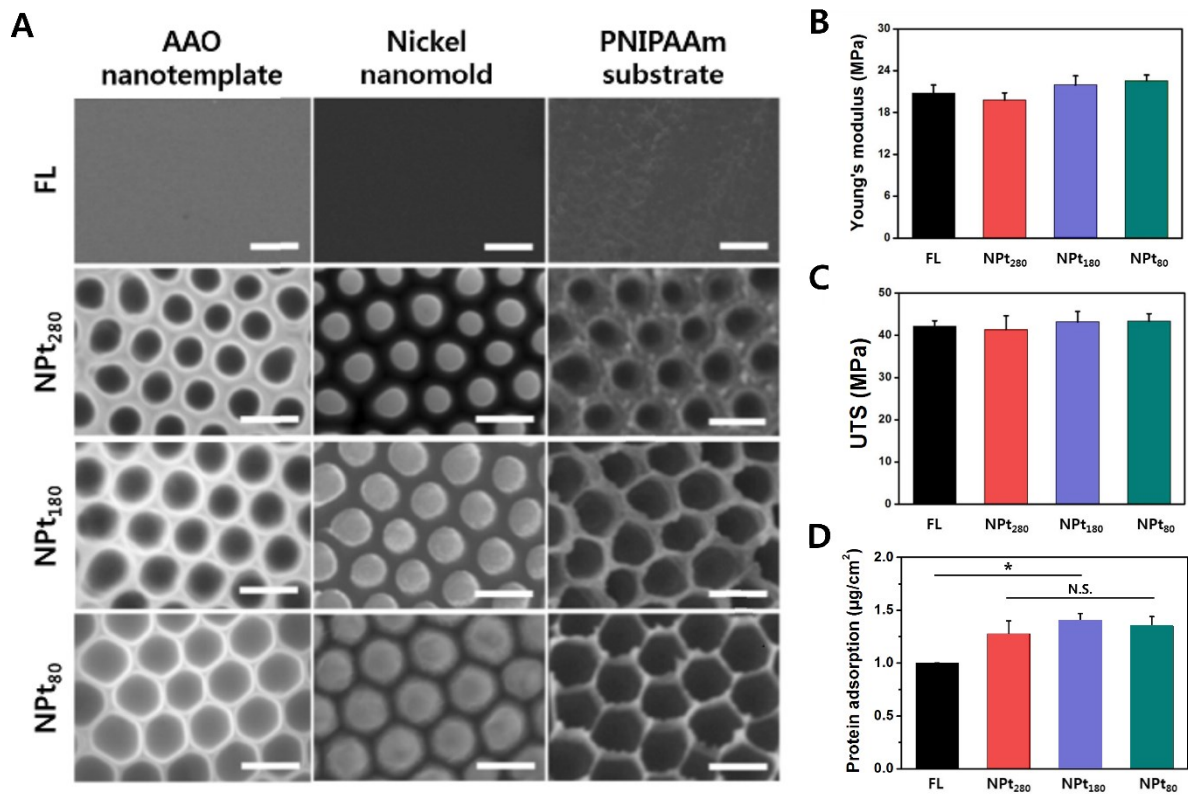

**Figure S1.** (A) SEM images of nanopore-patterned surfaces created during the three-step nanoreplication process and (B-D) their characterization.

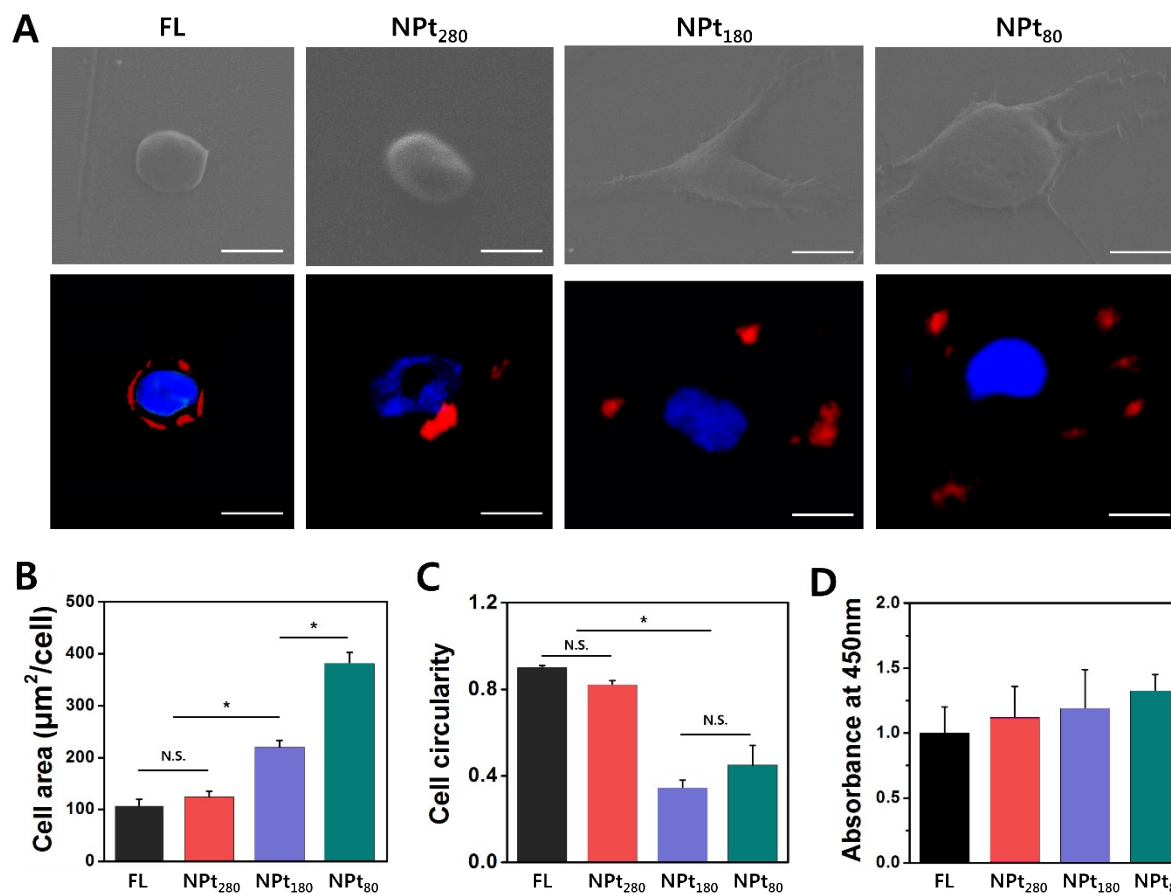

**Figure S2.** Individual cell analysis on bulk PNIPAAm nanopore-patterned surface having a wall thickness of 280, 180, and 80 nm compared with PNIPAAm FL. (A) SEM and vinculin immunostained images (scale bar: 10  $\mu\text{m}$ ) of human bone marrow mesenchymal stem cells (hBMSCs) cultured for 12 h on different PNIPAAm surfaces. (B) The spreading read and (C) circularity of hBMSCs cultured on different PNIPAAm surfaces. (D) Initial attachment of hBMSCs on different bulk PNIPAAm nanopore-patterned surfaces.

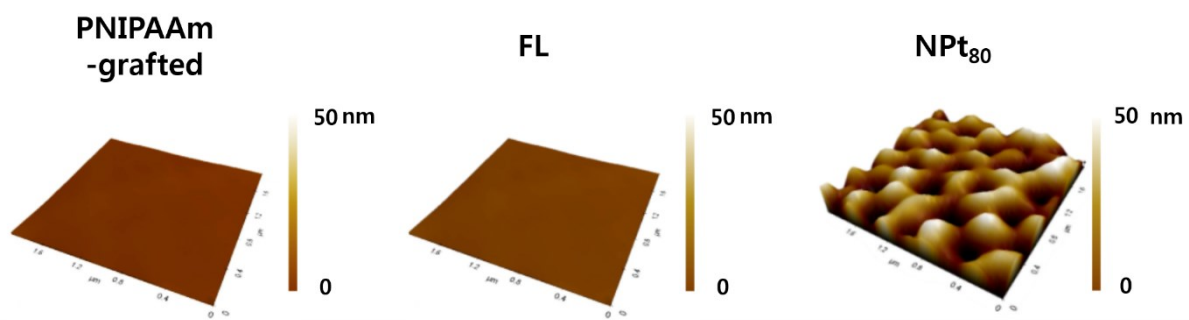

**Figure S3.** AFM images of three different PNIPAAm surfaces prior to their incubation at a temperature condition of 20 °C.
